# Supplementary material
Source: PubMed Central journal article supplement (PMC3912192)
Supplement: NIHMS398994-supplement-1.pdf [file NIHMS398994-supplement-1.pdf]

Developmental Cell, Volume 23

## Supplemental Information

### Tbx5-Hedgehog Molecular Networks

### Are Essential in the Second Heart Field

### for Atrial Septation

Linglin Xie, Andrew D. Hoffmann, Ozanna Burnicka-Turek, Joshua M. Friedland-Little, Ke Zhang, and Ivan P. Moskowitz

#### Inventory of Supplementary Information

Figure S1, related to Figure 4. *Tbx5* is not required for pSHF progenitor survival.

Table S1, related to Figure 4. Genes with > 2 fold expression change in *Tbx5*<sup>+/-</sup> versus wildtype E9.5 pSHF.

Table S1, related to Figure 6. Genomic regions with *Tbx5* binding sites included in Luciferase reporter assay and ChIP assay.

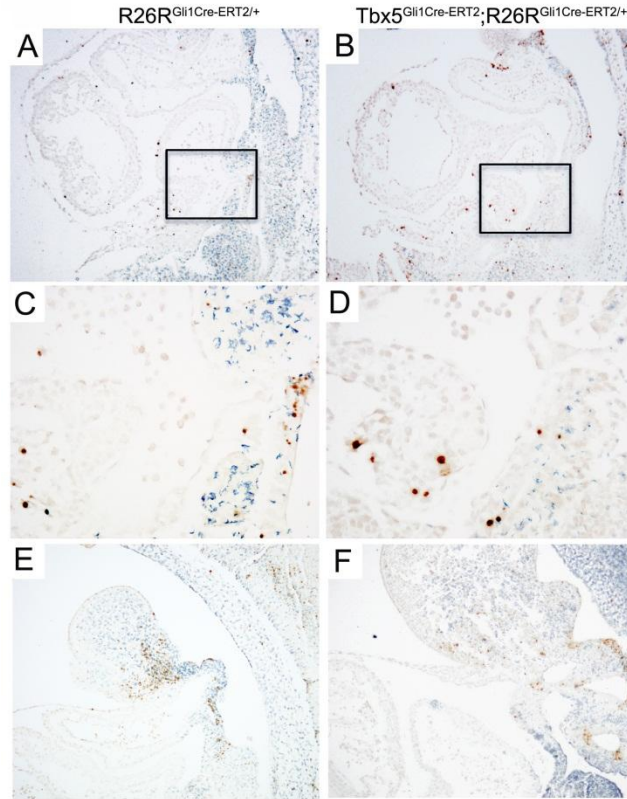

**Figure S1, related to Figure 4. *Tbx5* is not required for pSHF progenitor survival.**

A-D) Cell survival in the second heart field and DMP region is measured by TUNNEL staining at E9.5. Very few apoptotic cells are detected in these regions in both  $Tbx5^{Gli1Cre-ERT2};R26R^{Gli1Cre-ERT2/+}$  and  $R26R^{Gli1Cre-ERT2/+}$  embryos at E9.5.

E and F) Apoptotic cells in the pharyngeal ridge and the out flow tract serve as positive controls in TUNNEL staining.

**Table S1. Genes with > 2 fold expression change in *Tbx5*<sup>+/-</sup> versus wildtype E9.5 pSHF .**

(see accompanying Excel file)

**Table S2. related to Figure 6. Genomic regions with *Tbx5* binding sites included in Luciferase reporter assay and ChIP assay.**

| GENE NAME   | LUCIFERASE ASSAY |                         |                        |                                                                                                  | CHIP             |                       |                       |
|-------------|------------------|-------------------------|------------------------|--------------------------------------------------------------------------------------------------|------------------|-----------------------|-----------------------|
|             | Genomic fragment | Locus                   | Luciferase results     | <i>Tbx5</i> binding sites in subcloned fragments                                                 | Genomic fragment | Locus                 | ChIP results          |
| <i>Cdk6</i> | Cdk6Fr           | chr5:3341397-3344463    | 10.55±4.27<br>P=0.0009 | chr5:3343142-3343151<br>chr5:3343285-3343292<br>chr5:3344080-3344089<br>chr5:3344441-3344452     |                  |                       |                       |
| <i>Gas1</i> | Gas1Fr           | chr13:60277613-60279287 | 4.29±1.43<br>p=0.0012  | chr13:60278328-60278336                                                                          |                  |                       |                       |
| <i>Osr1</i> | Osr1Fr1          | chr12:9585330-9588700   | 5.82±1.42<br>p=0.0009  | chr12:9586539-9586548<br>chr12:9586598-9586605<br>chr12:9588539-9588548<br>chr12:9588580-9588591 | Osr1Fr1          | chr12:9588536-9588611 | 82.54±54.06<br>p<0.05 |
|             | Osr1Fr2          | chr12:9591000-9592000   | 1.4±0.59<br>p=0.61     | Not found in mouse sequence, in human sequence<br>chr2:19411576-19411587                         |                  |                       |                       |
|             | Osr1Fr3          | chr12:9595401-9596946   | 1.5 ±0.41<br>p=0.28    |                                                                                                  |                  |                       |                       |
|             | Osr1Fr4          | chr12:9601880-9602629   | 5.37±0.37<br>p=0.0009  | chr12:9602410-9602421                                                                            | Osr1Fr4          | chr12:9602333-9602473 | 98.14±45.72<br>p<0.05 |

Potential *Tbx5* binding sites were predicted from overlap of evolutionary conservation and ChIP-seq studies in the atrial cardiomyocyte HL-1 cell line (He et al., 2011). One *Cdk6* genomic fragment, one *Gas1* genomic fragment and four *Osr1* genomic fragments containing potential *Tbx5* binding sites were sub-cloned for luciferase reporter assay. Conserved canonical *Tbx5* binding sites were identified by rVISTA within these regions. Osr1fr1 and Osr1Fr4, demonstrating *Tbx5* responsiveness, were further tested for direct *Tbx5*-binding in the pSHF by ChIP-PCR.
